# Supplementary material for: Expanding the Structural Diversity of DNA Methyltransferase Inhibitors
Source: MDPI journal article supplement (doi:10.3390/ph14010017), 2020-12-27
Supplement: s1 [file s1]

## SUPPLEMENTARY MATERIAL

### Expanding the Structural Diversity of DNA Methyltransferase Inhibitors

K. Eurídice Juárez-Mercado<sup>1</sup>, Fernando D. Prieto-Martínez<sup>1</sup>, Norberto Sánchez-Cruz<sup>1</sup>, Andrea Peña-Castillo<sup>1</sup>, Diego Prada-Gracia<sup>2</sup>, José L. Medina-Franco<sup>\*,1</sup>

<sup>1</sup> DIFACQUIM research group, Department of Pharmacy, School of Chemistry, National Autonomous University of Mexico, Avenida Universidad 3000, Mexico City 04510, Mexico; kaeuridice@gmail.com (K.E.J-M.); ferdpm4@hotmail.com (F.D.P-M.); norberto.sc90@gmail.com (N.S-C.); andrea.pecas93@gmail.com (A.P-C.).

<sup>2</sup> Research Unit on Computational Biology and Drug Design, Children's Hospital of Mexico Federico Gomez, Mexico City, Mexico; prada.gracia@gmail.com (D.P-G.)

\* Correspondence: medinajl@unam.mx

#### Contents

|                                                                                                                                                                              | Page |
|------------------------------------------------------------------------------------------------------------------------------------------------------------------------------|------|
| <b>Figure S1</b>                                                                                                                                                             |      |
| Chemical structures of the ten most frequent (Bemis-Murcko) scaffolds of the active DNMT inhibitors available in ChEMBL 27.                                                  | S2   |
| <b>Table S1</b>                                                                                                                                                              |      |
| Chemical vendors of the ten compounds tested and their purity as supplied by the vendor.                                                                                     | S3   |
| <b>Figure S2</b>                                                                                                                                                             |      |
| Comparison of the co-crystal position of SAH in the catalytic site of DNMT1 (PDB ID: 4WXX) with the predicted binding mode of <b>A) CSC027694519</b> and <b>B) 7936171</b> . | S4   |
| <b>Figure S3.</b>                                                                                                                                                            |      |
| Docking poses of glyburide with DNMT1 obtained with the software PLANTS.                                                                                                     | S5   |
| <b>Figure S4</b>                                                                                                                                                             |      |
| Microstate network analysis of glyburide.                                                                                                                                    | S5   |

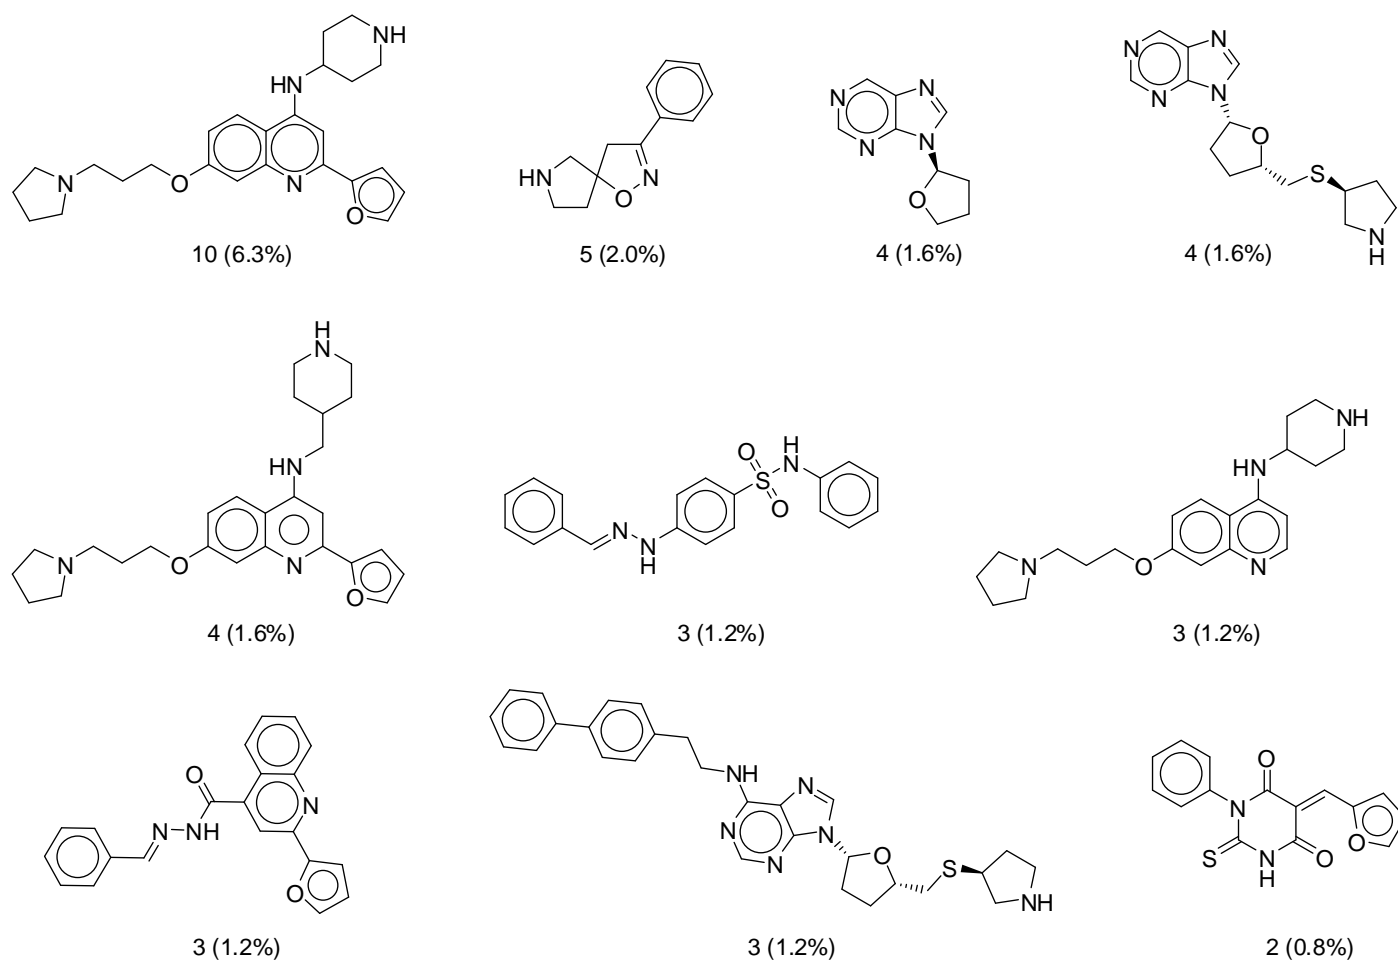

**Figure S1.** Chemical structures of the ten most frequent (Bemis-Murcko) scaffolds of the active DNMT inhibitors available in ChEMBL 27. The percentage of frequency is indicated in parenthesis.

**Table S1.** Chemical vendors of the ten compounds tested and their purity as supplied by the vendor.

| Compound            | Vendor     | Purity % (provided by vendor) |
|---------------------|------------|-------------------------------|
| Glyburide           | TargetMol  | 99.77                         |
| Panobinostat        | TargetMol  | 98                            |
| Theaflavin          | TargetMol  | 97.76                         |
| <b>7936171</b>      | Chembridge | $\geq 90$                     |
| <b>CSC027480404</b> | ChemSpace  | 90                            |
| <b>CSC026286840</b> | ChemSpace  | 100                           |
| <b>CSC027694519</b> | ChemSpace  | 100                           |
| <b>6631802</b>      | Chembridge | $\geq 90$                     |
| <b>CSC027796832</b> | ChemSpace  | 94                            |
| <b>CSC027083851</b> | ChemSpace  | 100                           |

**A**

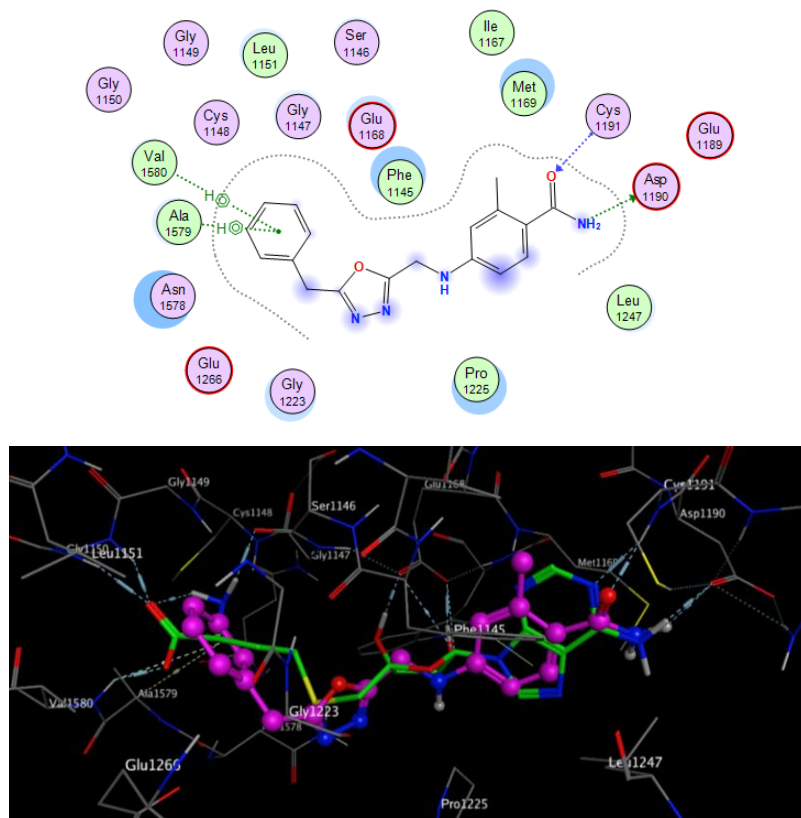

**B**

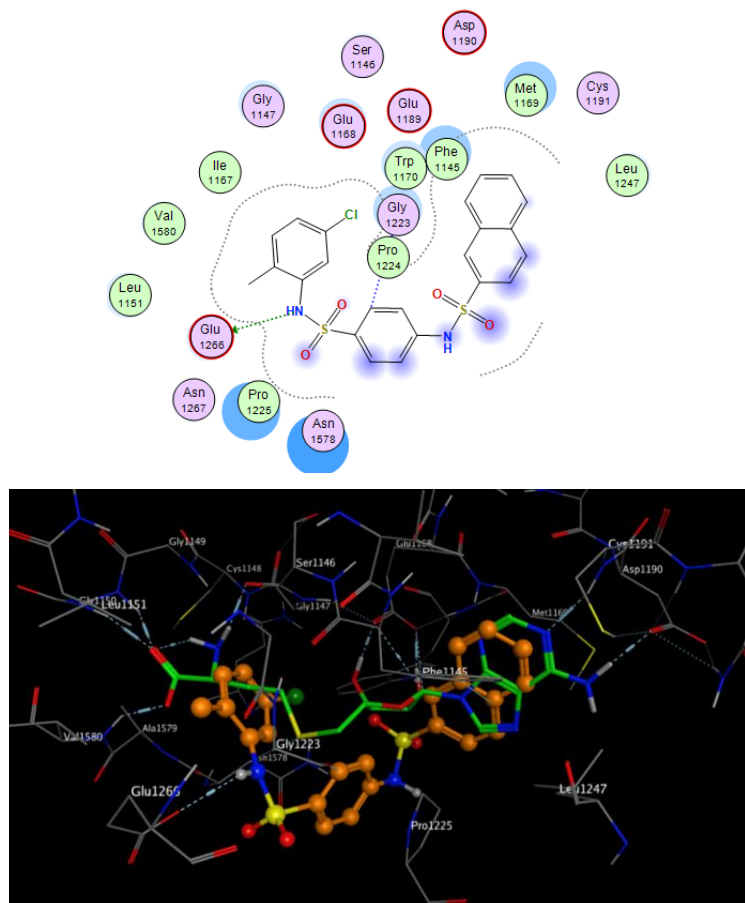

**Figure S2.** Comparison of the co-crystal position of SAH in the catalytic site of DNMT1 (PDB ID: 4WXX) with the predicted binding mode of **A) CSC027694519** and **B) 7936171**.

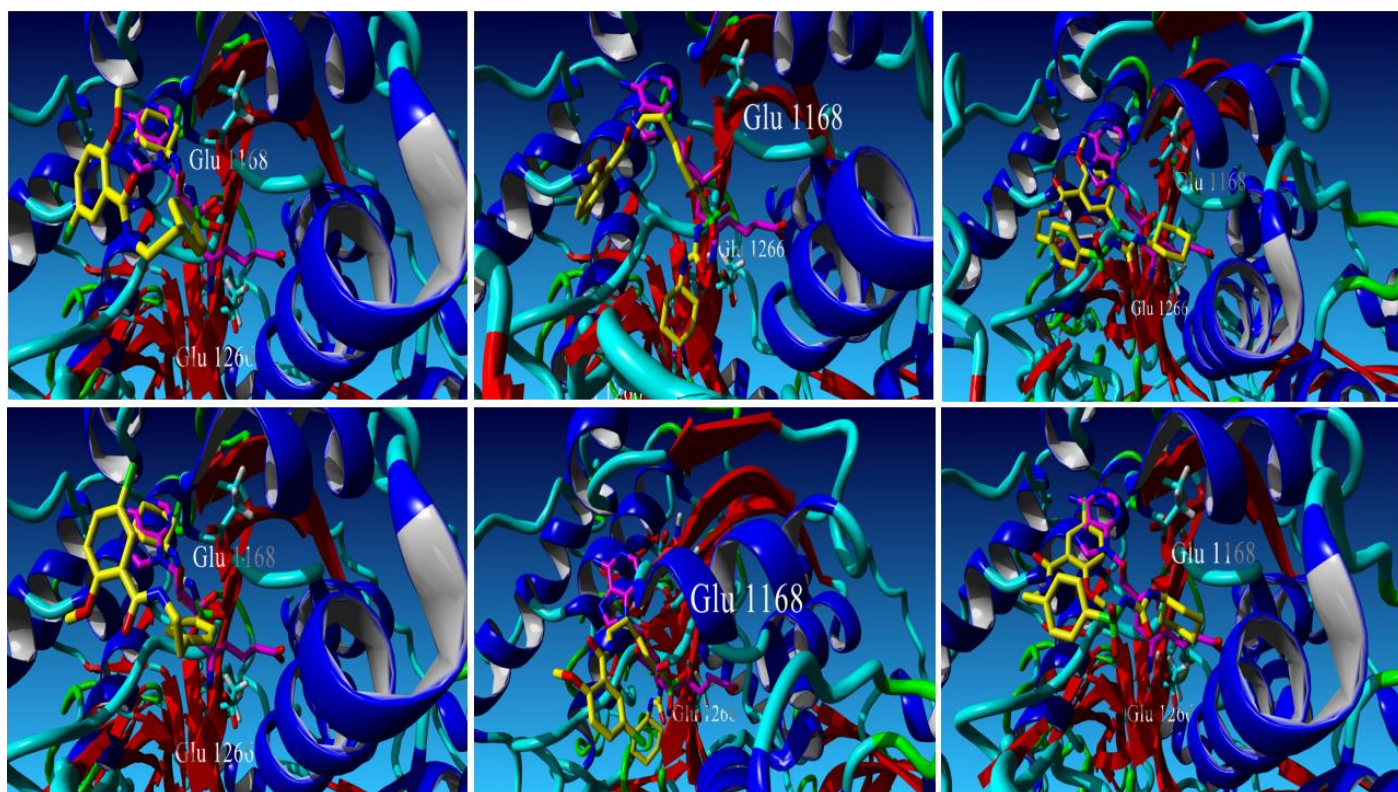

**Figure S3.** Docking poses of glyburide with DNMT1 obtained with the software PLANTS.

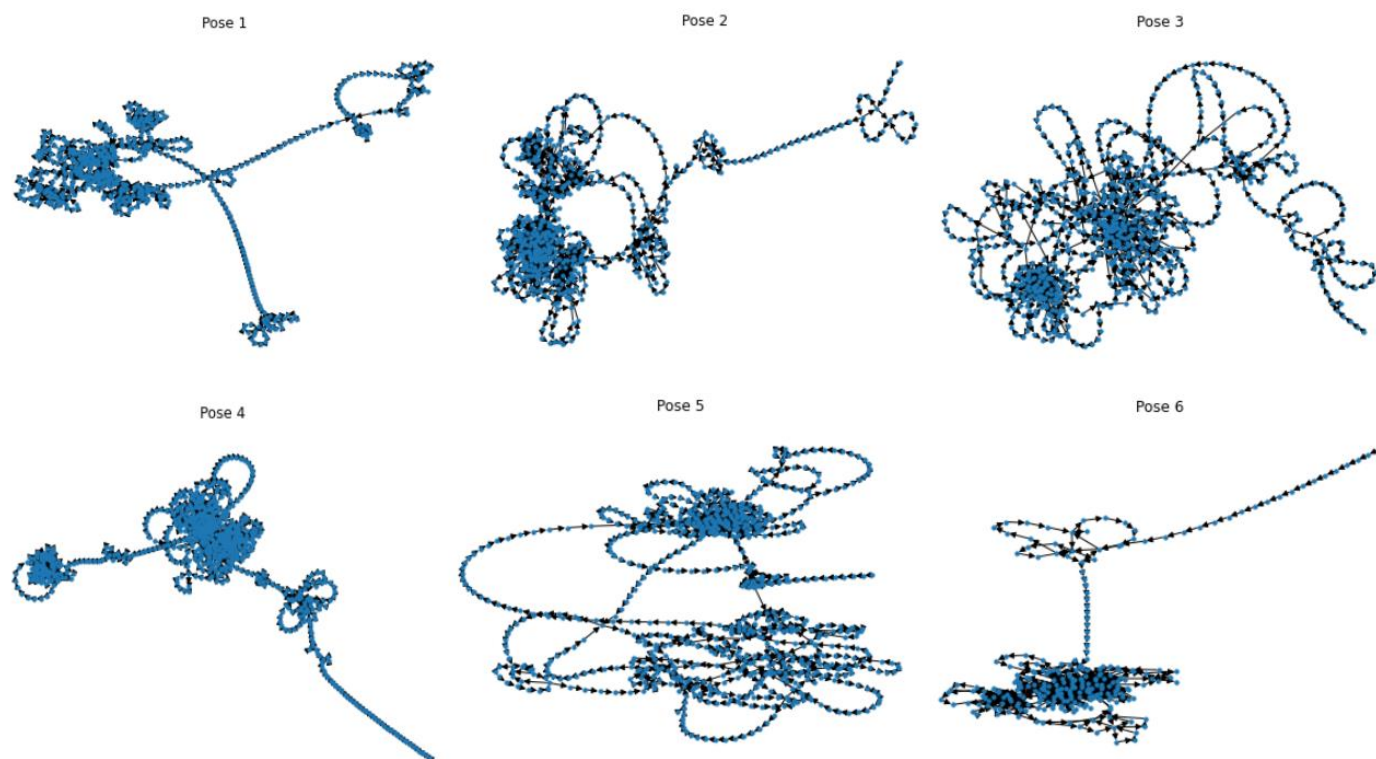

**Figure S4.** Microstate network analysis of glyburide.
